# Supplementary material for: Comparing Bayesian and non-Bayesian accounts of human confidence reports
Source: PubMed Central journal article supplement (PMC6258566; doi:10.1371/journal.pcbi.1006572), 2018-11-13
Supplement: pcbi.1006572.s017.pdf [file pcbi.1006572.s017.pdf]

|          |             | 12 pars.<br>Fixed        | 13 pars.<br>Bayes- $dN$ | 12 pars.<br>Ori. Est.   | 13 pars.<br>Lin. Neur. | 16 pars.<br>Lin     |
|----------|-------------|--------------------------|-------------------------|-------------------------|------------------------|---------------------|
| 16 pars. | Quad        | $-3534$ $[-4552, -2529]$ | $-581$ $[-938, -278]$   | $-1241$ $[-1798, -767]$ | $-270$ $[-436, -117]$  | $-14$ $[-325, 246]$ |
| 16 pars. | Lin         | $-3532$ $[-4353, -2651]$ | $-572$ $[-799, -339]$   | $-1232$ $[-1566, -863]$ | $-259$ $[-609, 124]$   |                     |
| 13 pars. | Lin. Neur.  | $-3255$ $[-4343, -2231]$ | $-313$ $[-724, 75]$     | $-972$ $[-1599, -412]$  |                        |                     |
| 12 pars. | Ori. Est.   | $-2302$ $[-2881, -1705]$ | $651$ $[425, 885]$      |                         |                        |                     |
| 13 pars. | Bayes- $dN$ | $-2956$ $[-3723, -2163]$ |                         |                         |                        |                     |
