# Supplementary material for: Comparing Bayesian and non-Bayesian accounts of human confidence reports
Source: PubMed Central journal article supplement (PMC6258566; doi:10.1371/journal.pcbi.1006572), 2018-11-13
Supplement: pcbi.1006572.s018.pdf [file pcbi.1006572.s018.pdf]

|          |                        | 15 pars.<br>Fixed    | 13 pars.<br>Bayes <sub>g</sub> -dN | 16 pars.<br>Bayes <sub>w</sub> -dN | 15 pars.<br>Ori. Est. | 16 pars.<br>Lin. Neur. | 22 pars.<br>Lin    |
|----------|------------------------|----------------------|------------------------------------|------------------------------------|-----------------------|------------------------|--------------------|
| 22 pars. | Quad                   | -3234 [-4390, -2099] | -1664 [-2698, -958]                | -978 [-1756, -406]                 | -2156 [-3352, -1192]  | -2060 [-3368, -1037]   | -744 [-1387, -224] |
| 22 pars. | Lin                    | -2480 [-3323, -1645] | -919 [-1788, -279]                 | -232 [-900, 346]                   | -1415 [-2439, -439]   | -1326 [-2442, -337]    |                    |
| 16 pars. | Lin. Neur.             | -1117 [-2093, -349]  | 421 [-1095, 1689]                  | 1106 [-374, 2583]                  | -80 [-222, 62]        |                        |                    |
| 15 pars. | Ori. Est.              | -1043 [-1962, -273]  | 502 [-934, 1693]                   | 1184 [-202, 2588]                  |                       |                        |                    |
| 16 pars. | Bayes <sub>w</sub> -dN | -2230 [-3239, -1307] | -691 [-1082, -390]                 |                                    |                       |                        |                    |
| 13 pars. | Bayes <sub>g</sub> -dN | -1534 [-2425, -634]  |                                    |                                    |                       |                        |                    |
