# Supplementary material for: Comparing Bayesian and non-Bayesian accounts of human confidence reports
Source: PubMed Central journal article supplement (PMC6258566; doi:10.1371/journal.pcbi.1006572), 2018-11-13
Supplement: pcbi.1006572.s019.pdf [file pcbi.1006572.s019.pdf]

|          |             | 8 pars.<br>Fixed    | 9 pars.<br>Bayes- $dN$ | 8 pars.<br>Ori. Est. | 9 pars.<br>Lin. Neur. | 10 pars.<br>Lin  |
|----------|-------------|---------------------|------------------------|----------------------|-----------------------|------------------|
| 10 pars. | Quad        | -1319 [-2541, -611] | -236 [-1072, 358]      | -154 [-772, 613]     | -729 [-1365, -38]     | 323 [-423, 1127] |
| 10 pars. | Lin         | -1690 [-2534, -976] | -595 [-927, -311]      | -492 [-1023, 238]    | -1087 [-1690, -245]   |                  |
| 9 pars.  | Lin. Neur.  | -591 [-2068, 460]   | 486 [-504, 1211]       | 591 [406, 789]       |                       |                  |
| 8 pars.  | Ori. Est.   | -1190 [-2614, -144] | -114 [-1026, 579]      |                      |                       |                  |
| 9 pars.  | Bayes- $dN$ | -1095 [-1657, -629] |                        |                      |                       |                  |
