# Supplementary material for: Comparing Bayesian and non-Bayesian accounts of human confidence reports
Source: PubMed Central journal article supplement (PMC6258566; doi:10.1371/journal.pcbi.1006572), 2018-11-13
Supplement: pcbi.1006572.s020.pdf [file pcbi.1006572.s020.pdf]

|          |                        | 15 pars.<br>Fixed    | 13 pars.<br>Bayes <sub>g</sub> -dN | 16 pars.<br>Bayes <sub>w</sub> -dN | 15 pars.<br>Ori. Est. | 16 pars.<br>Lin. Neur. | 22 pars.<br>Lin |
|----------|------------------------|----------------------|------------------------------------|------------------------------------|-----------------------|------------------------|-----------------|
| 22 pars. | Quad                   | -4367 [-6304, -2391] | -1670 [-3268, -39]                 | -1135 [-2501, 333]                 | -2836 [-4544, -1122]  | -2449 [-4200, -969]    | 606 [6, 1269]   |
| 22 pars. | Lin                    | -5016 [-6727, -3090] | -2303 [-3578, -921]                | -1773 [-2845, -451]                | -3497 [-4860, -1817]  | -3127 [-4549, -1575]   |                 |
| 16 pars. | Lin. Neur.             | -1837 [-3566, -378]  | 846 [-609, 2092]                   | 1386 [-13, 2732]                   | -345 [-933, 262]      |                        |                 |
| 15 pars. | Ori. Est.              | -1498 [-2877, -420]  | 1184 [23, 2129]                    | 1724 [575, 2808]                   |                       |                        |                 |
| 16 pars. | Bayes <sub>w</sub> -dN | -3257 [-3965, -2494] | -533 [-920, -283]                  |                                    |                       |                        |                 |
| 13 pars. | Bayes <sub>g</sub> -dN | -2704 [-3351, -2027] |                                    |                                    |                       |                        |                 |
