# Supplementary material for: Comparing Bayesian and non-Bayesian accounts of human confidence reports
Source: PubMed Central journal article supplement (PMC6258566; doi:10.1371/journal.pcbi.1006572), 2018-11-13
Supplement: pcbi.1006572.s021.pdf [file pcbi.1006572.s021.pdf]

|          |                        | 19 pars.<br>Fixed    | 13 pars.<br>Bayes <sub>U</sub> -dN | 17 pars.<br>Bayes <sub>S</sub> -dN | 20 pars.<br>Bayes <sub>W</sub> -dN | 19 pars.<br>Ori. Est. | 20 pars.<br>Lin. Neur. | 30 pars.<br>Lin |
|----------|------------------------|----------------------|------------------------------------|------------------------------------|------------------------------------|-----------------------|------------------------|-----------------|
| 30 pars. | Quad                   | -2014 [-3036, -1186] | -1096 [-1807, -530]                | -523 [-893, -220]                  | -331 [-562, -109]                  | -1136 [-1815, -638]   | -1124 [-1922, -613]    | 74 [-195, 252]  |
| 30 pars. | Lin                    | -2095 [-2889, -1344] | -1160 [-1780, -694]                | -589 [-841, -375]                  | -396 [-622, -186]                  | -1218 [-1680, -791]   | -1205 [-1757, -785]    |                 |
| 20 pars. | Lin. Neur.             | -876 [-1401, -395]   | 55 [-711, 693]                     | 623 [99, 1184]                     | 801 [253, 1491]                    | -7 [-219, 216]        |                        |                 |
| 19 pars. | Ori. Est.              | -872 [-1297, -487]   | 56 [-561, 574]                     | 620 [218, 1089]                    | 813 [356, 1394]                    |                       |                        |                 |
| 20 pars. | Bayes <sub>W</sub> -dN | -1678 [-2542, -1007] | -767 [-1262, -386]                 | -190 [-363, -82]                   |                                    |                       |                        |                 |
| 17 pars. | Bayes <sub>S</sub> -dN | -1490 [-2210, -886]  | -565 [-1032, -266]                 |                                    |                                    |                       |                        |                 |
| 13 pars. | Bayes <sub>U</sub> -dN | -907 [-1572, -365]   |                                    |                                    |                                    |                       |                        |                 |
