# Supplementary material for: Comparing Bayesian and non-Bayesian accounts of human confidence reports
Source: PubMed Central journal article supplement (PMC6258566; doi:10.1371/journal.pcbi.1006572), 2018-11-13
Supplement: pcbi.1006572.s022.pdf [file pcbi.1006572.s022.pdf]

|          |                        | 15 pars.<br>Fixed    | 13 pars.<br>Bayes <sub>S</sub> -dN | 16 pars.<br>Bayes <sub>W</sub> -dN | 15 pars.<br>Ori. Est. | 16 pars.<br>Lin. Neur. | 22 pars.<br>Lin     |
|----------|------------------------|----------------------|------------------------------------|------------------------------------|-----------------------|------------------------|---------------------|
| 22 pars. | Quad                   | -7326 [-9955, -4905] | -2833 [-3807, -1926]               | -1361 [-2022, -777]                | -7120 [-9838, -4636]  | -6902 [-10376, -3981]  | -1577 [-2562, -750] |
| 22 pars. | Lin                    | -5759 [-7866, -3694] | -1240 [-2567, 65]                  | 226 [-812, 1246]                   | -5530 [-7707, -3539]  | -5337 [-8191, -2846]   |                     |
| 16 pars. | Lin. Neur.             | -450 [-1535, 1290]   | 4114 [733, 7796]                   | 5552 [2338, 9135]                  | -214 [-1176, 1256]    |                        |                     |
| 15 pars. | Ori. Est.              | -256 [-841, 423]     | 4311 [1432, 7134]                  | 5727 [3067, 8527]                  |                       |                        |                     |
| 16 pars. | Bayes <sub>W</sub> -dN | -5967 [-8702, -3369] | -1454 [-2179, -835]                |                                    |                       |                        |                     |
| 13 pars. | Bayes <sub>S</sub> -dN | -4505 [-7282, -1816] |                                    |                                    |                       |                        |                     |
