# Supplementary material for: Comparing Bayesian and non-Bayesian accounts of human confidence reports
Source: PubMed Central journal article supplement (PMC6258566; doi:10.1371/journal.pcbi.1006572), 2018-11-13
Supplement: pcbi.1006572.s023.pdf [file pcbi.1006572.s023.pdf]

|         |             | 7 pars.<br>Fixed        | 8 pars.<br>Bayes- $dN$ | 7 pars.<br>Ori. Est.   | 8 pars.<br>Lin. Neur.   | 8 pars.<br>Lin      |
|---------|-------------|-------------------------|------------------------|------------------------|-------------------------|---------------------|
| 8 pars. | Quad        | $-777$ $[-1361, -359]$  | $162$ $[-290, 670]$    | $-531$ $[-1059, -23]$  | $-988$ $[-1526, -549]$  | $290$ $[-138, 793]$ |
| 8 pars. | Lin         | $-1084$ $[-1675, -619]$ | $-117$ $[-436, 76]$    | $-830$ $[-1317, -334]$ | $-1294$ $[-1825, -778]$ |                     |
| 8 pars. | Lin. Neur.  | $215$ $[-566, 827]$     | $1174$ $[535, 1772]$   | $457$ $[254, 685]$     |                         |                     |
| 7 pars. | Ori. Est.   | $-255$ $[-987, 369]$    | $707$ $[119, 1259]$    |                        |                         |                     |
| 8 pars. | Bayes- $dN$ | $-964$ $[-1290, -663]$  |                        |                        |                         |                     |
